# Supplementary material
Source: publisher figshare collection journal article supplement (https://acs.figshare.com/ndownloader/files/6885684)
Supplement: Supplementary file 1 [file 6885684]

## Supporting Information for:

### Automated Protocol for Large-Scale Modeling of Gene Expression Data

Michelle Lynn Hall,<sup>\*,†,¶</sup> David Calkins,<sup>‡</sup> and Woody B. Sherman<sup>†</sup>

<sup>†</sup>Schrödinger, Inc., 222 Third Street, Cambridge, MA 02143

<sup>‡</sup>Schrödinger, Inc., 101 SW Main St #1300, Portland, OR 97204

<sup>¶</sup>Current address: Moderna Therapeutics, 200 Technology Square, Cambridge, MA 02139

\**E-mail: michelle.lynn.hall@gmail.com*

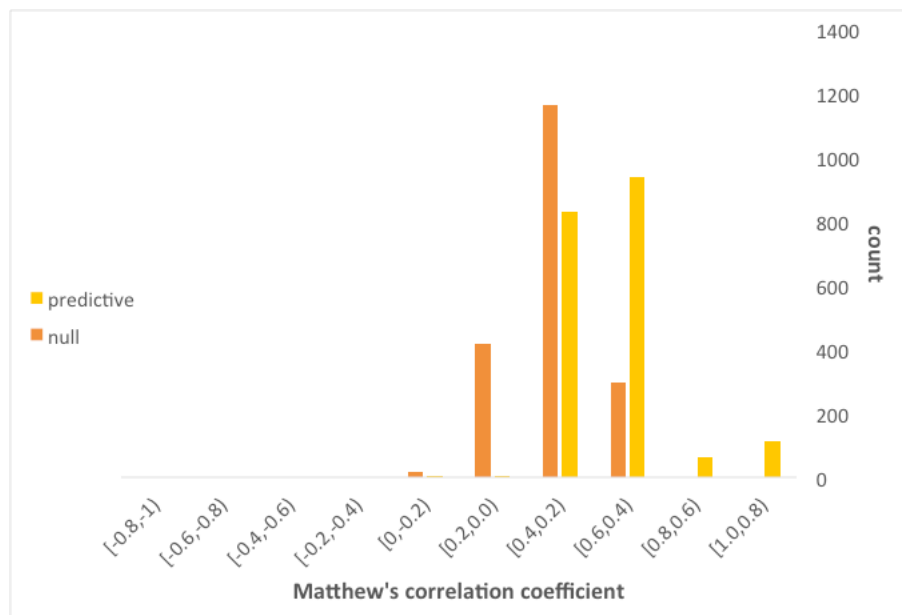

**Figure S1:** Distribution of Matthew's Correlation Coefficients across training sets for the predictive and null models

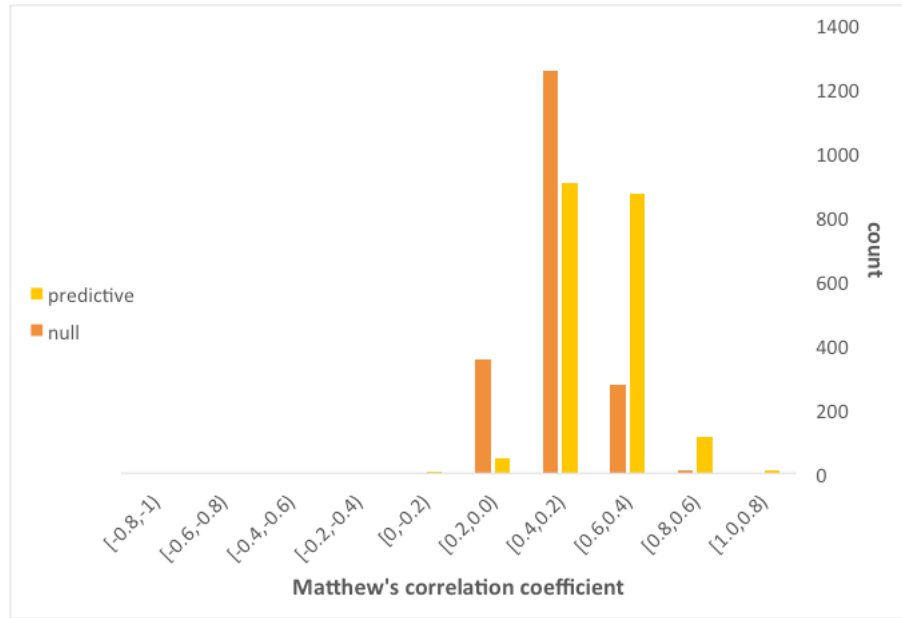

**Figure S2:** Distribution of Matthew's Correlation Coefficients across test sets for the predictive and null models

| <b>Table S1:</b> Matthew's Correlation Coefficient statistics for training and test sets of both predictive and null models |                   |          |              |          |
|-----------------------------------------------------------------------------------------------------------------------------|-------------------|----------|--------------|----------|
|                                                                                                                             | predictive models |          | null models  |          |
|                                                                                                                             | training set      | test set | training set | test set |
| minimum                                                                                                                     | -0.04             | -0.03    | -0.07        | 0.03     |
| maximum                                                                                                                     | 1.00              | 1.00     | 0.56         | 0.80     |
| average                                                                                                                     | 0.45              | 0.41     | 0.29         | 0.29     |
| median                                                                                                                      | 0.42              | 0.40     | 0.30         | 0.29     |
| standard deviation                                                                                                          | 0.15              | 0.12     | 0.11         | 0.10     |

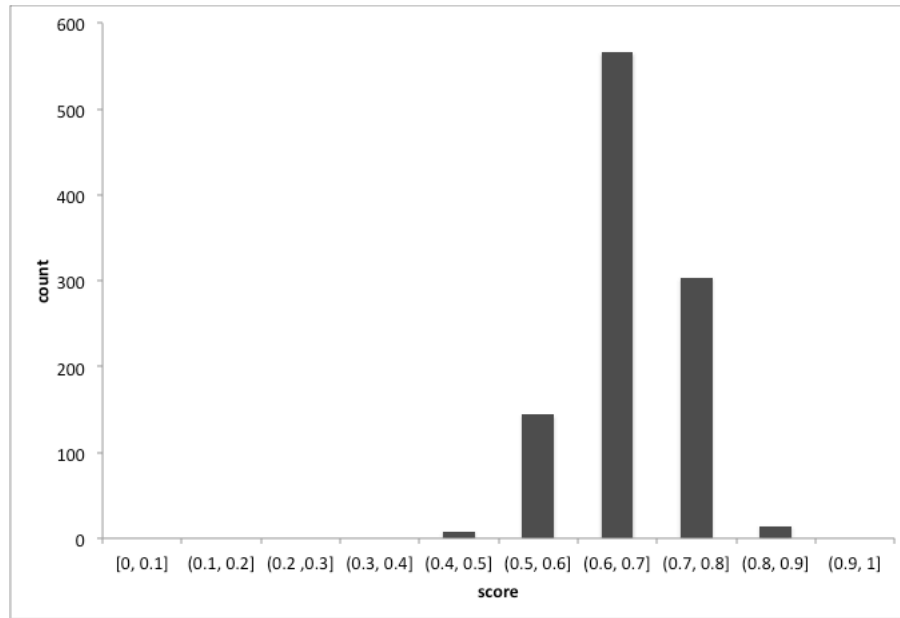

**Figure S3:** Distribution of *score* for the predictive models when generated based upon two categories only (i.e., affected or not) instead of creating two, two-category models [i.e., (a) up-regulated or not and (b) down-regulated or not]. Compared to the plots shown in Figure 4, we see a slight degradation in score. In particular, the average score here is only 0.67, compared to 0.71 for the scores shown in Figure 4.
